# Supplementary material for: Physicochemical properties of [Cnmim][TFA] (n = 2, 3, 4, 5, 6) ionic liquids
Source: Royal Society of Chemistry journal article supplement (doi:10.1039/c7ra00197e), 2017-01-01
Supplement: c7ra00197e1.pdf [file c7ra00197e1.pdf]

## Supporting information

### Physicolchemical properties of ionic liquids $[C_n\text{mim}][\text{TFA}]$ ( $n = 2,3,4,5,6$ )

Da-Wei Fang, Fang Zhang, Rui Jia, Wei-jun Shan, Li-xin Xia\*, Jia-zhen Yang\*  
Institute of rare and scattered elements, College of chemistry, Liaoning University, Shenyang, 110036, P. R. China

#### A: $^1\text{H}$ NMR Spectrum of $[\text{C}_2\text{mim}][\text{TFA}]$

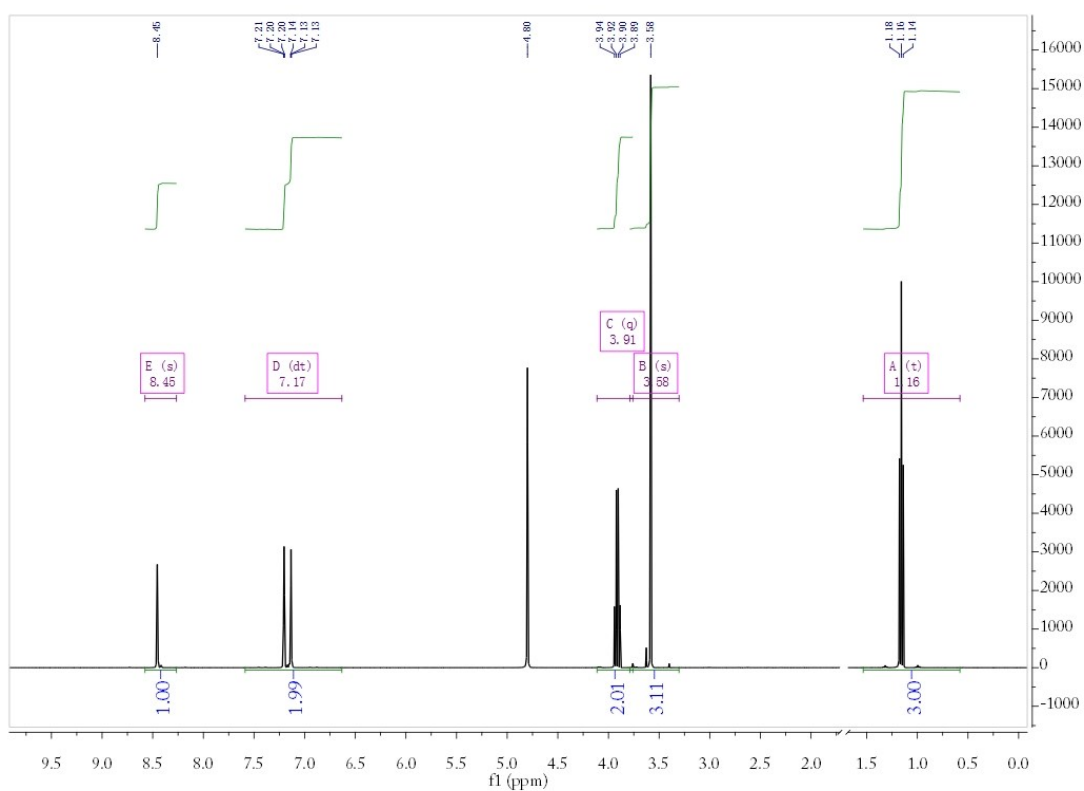

B:  $^1\text{H}$ NMR Spectrum of  $[\text{C}_3\text{mim}][\text{TFA}]$

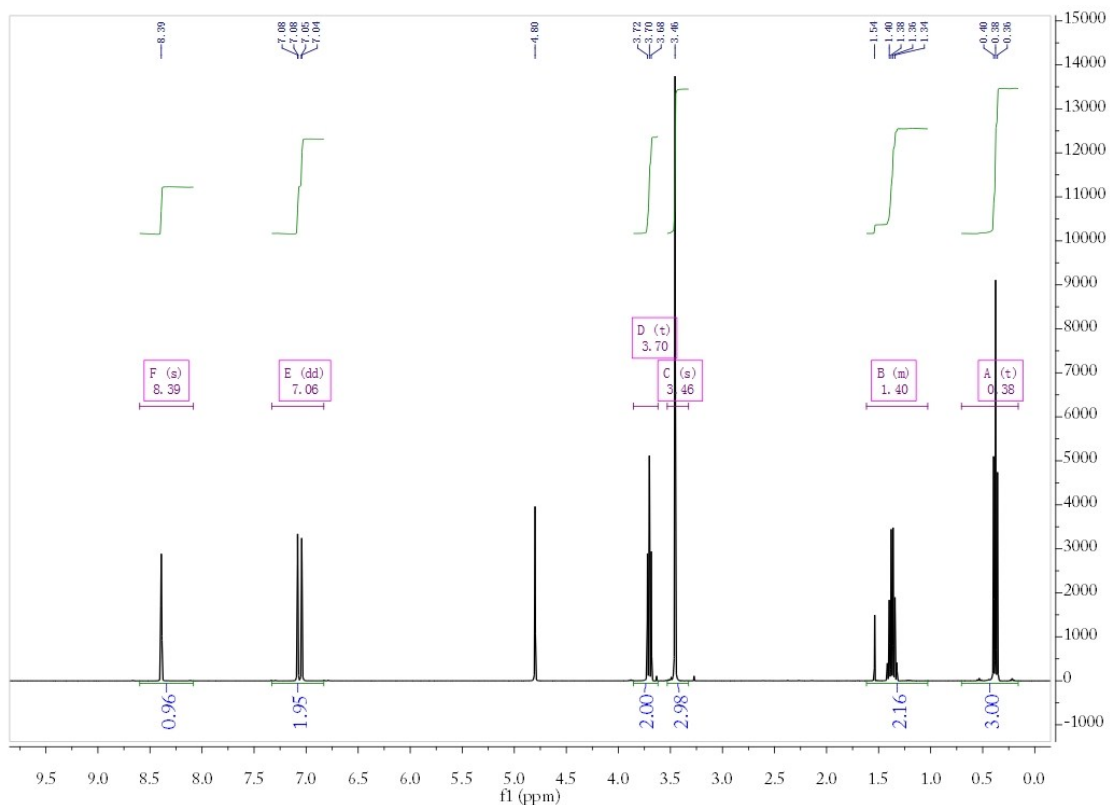

C:  $^1\text{H}$ NMR Spectrum of  $[\text{C}_4\text{mim}][\text{TFA}]$

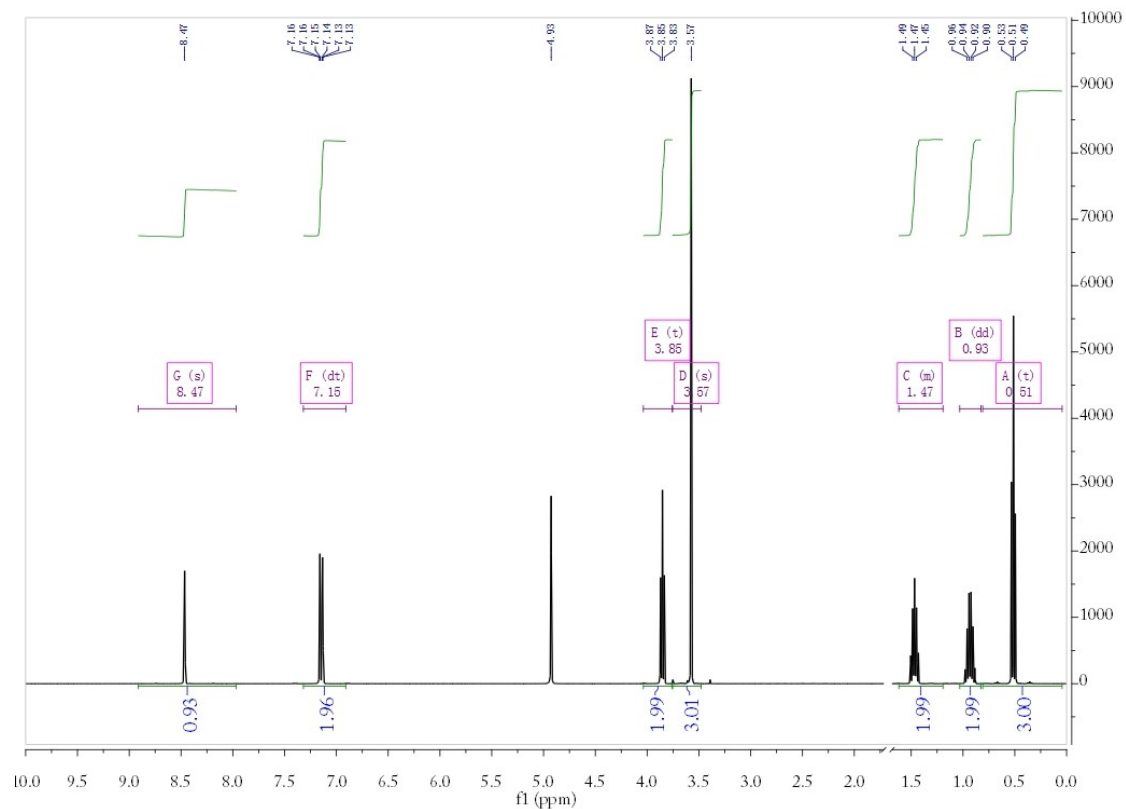

D:  $^1\text{H}$ NMR Spectrum of  $[\text{C}_5\text{mim}][\text{TFA}]$

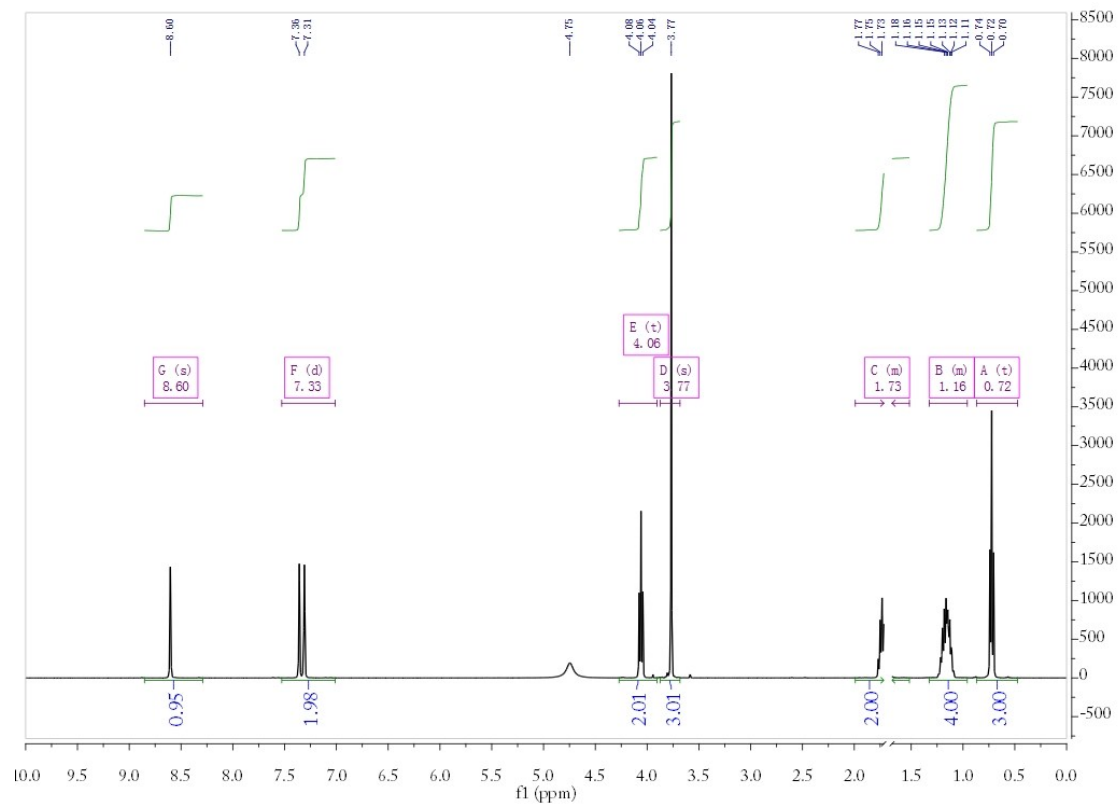

E:  $^1\text{H}$ NMR Spectrum of  $[\text{C}_6\text{mim}][\text{TFA}]$

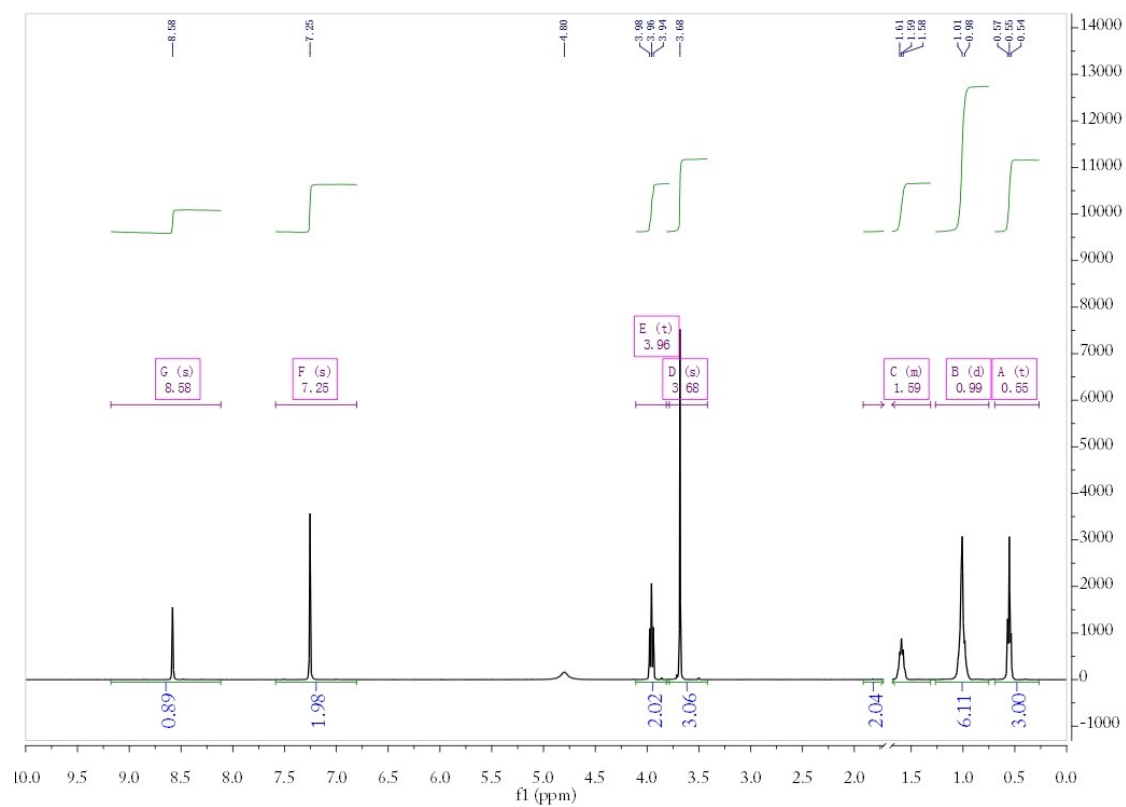

F:  $^9\text{F}$ NMR Spectrum of  $[\text{C}_n\text{mim}][\text{TFA}]$

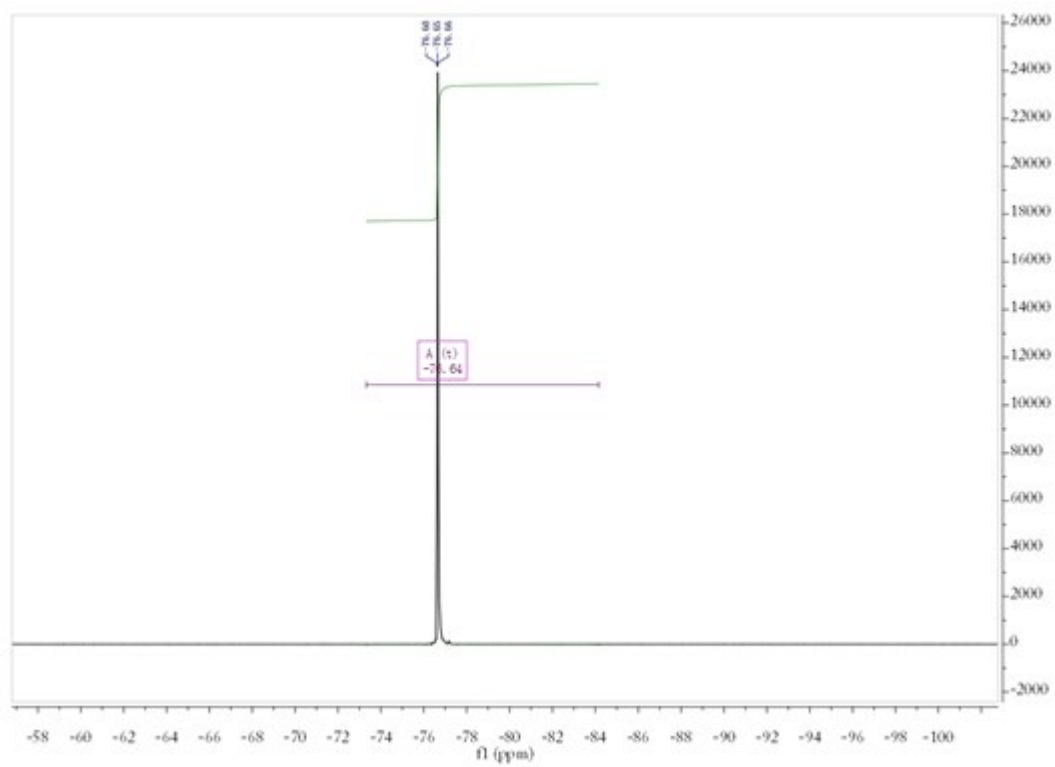

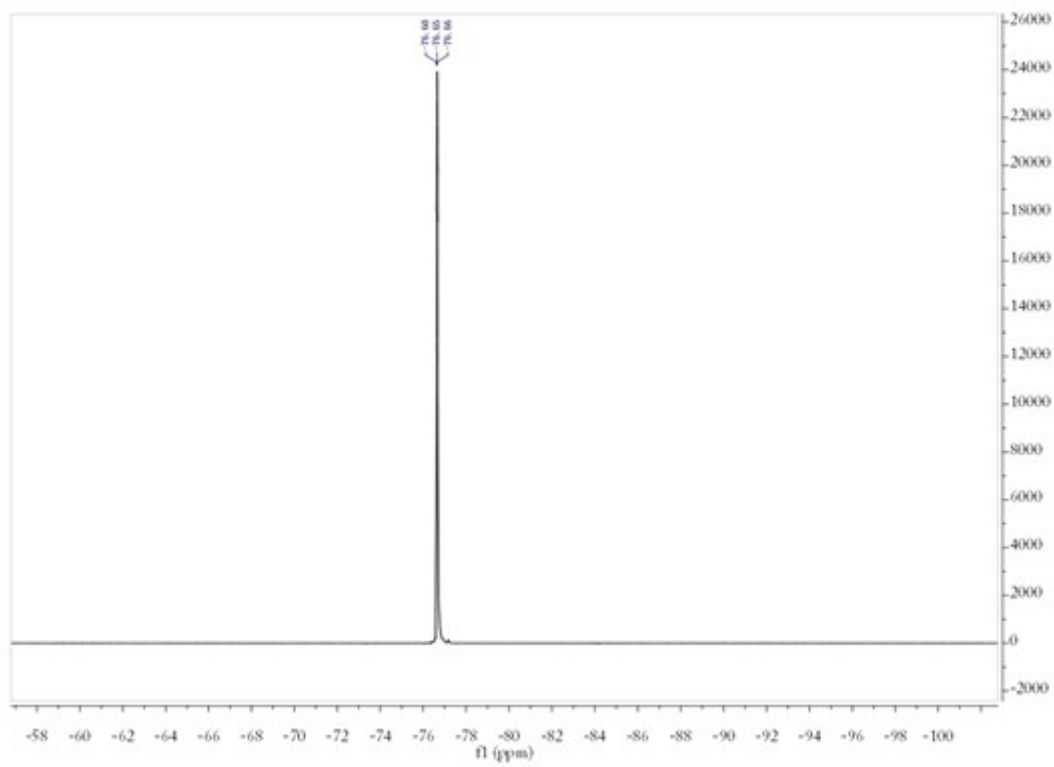

${}^9\text{F}$ NMR Spectrum of  $[\text{C}_2\text{mim}][\text{TFA}]$

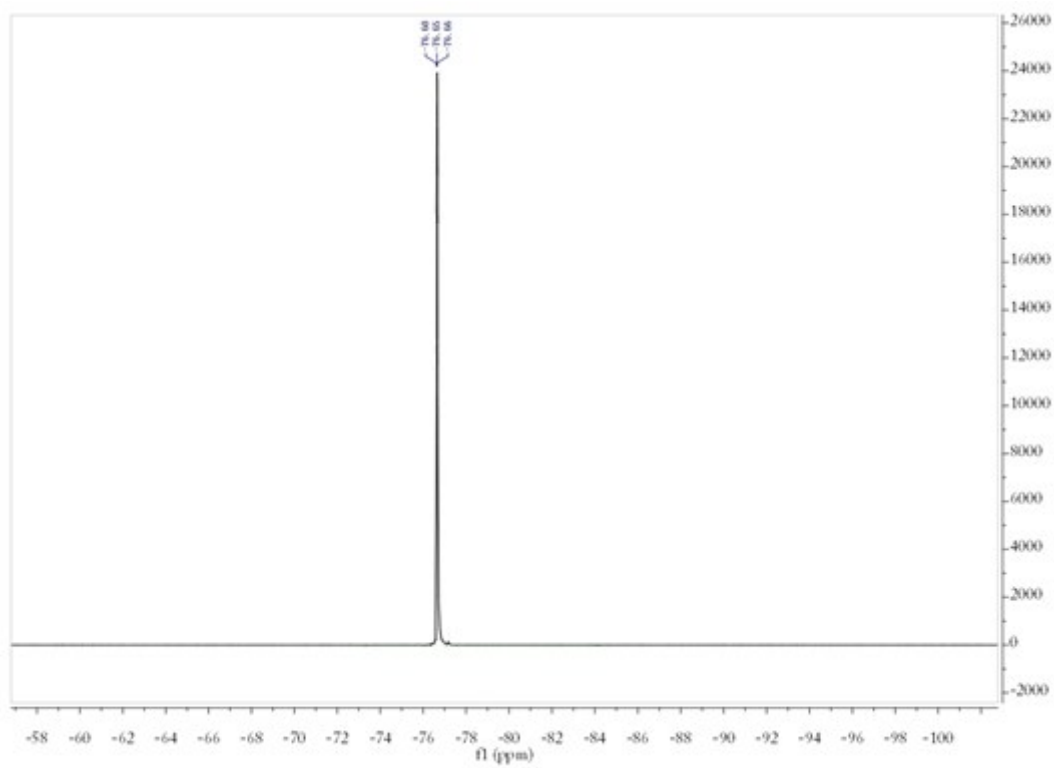

${}^9\text{F}$ NMR Spectrum of  $[\text{C}_6\text{mim}][\text{TFA}]$
